# Supplementary material
Source: PubMed Central journal article supplement (PMC2682068)
Supplement: supp_83_10_5005__2.pdf [file supp_83_10_5005__2.pdf]

# A

|           |                 |              |              |               |            |          |            |          |            |           |
|-----------|-----------------|--------------|--------------|---------------|------------|----------|------------|----------|------------|-----------|
|           | <b>6</b>        | <b>6</b>     | <b>456</b>   | <b>33</b>     | <b>1</b>   | <b>2</b> | <b>015</b> | <b>5</b> | <b>100</b> | <b>01</b> |
| ATSN1-M1  | GAATATCTGGAAGTT | CAGGCCCAAAGG | CTTTATATTTT  | CAGAGGCGGGAT  | TTTATATCAG |          |            |          |            |           |
| ATSN1-M2  | GAATATCTGGAAGTT | CAGGCCCAAAGG | CCTTATATCTTT | TAGAGGCGGGAC  | TTATATTAG  |          |            |          |            |           |
| ATSN1-M3  | GAATATCTGGAAGTT | CAGGCCCAAAGG | TCTTATATTTT  | CAGAGGCGGGAT  | TTTATATTAG |          |            |          |            |           |
| ATSN1-M4  | GAATATCTGGAAGTT | CAGGTTCAAAGG | TTTTATATTTT  | CAGAGGCGGGAT  | TTTATATTAG |          |            |          |            |           |
| ATSN1-M5  | GAATATCTGGAAGTT | CAGGTCCAAAGG | CCTTATATCTT  | CCAGAGGCGGGAT | TTTATATTAG |          |            |          |            |           |
| ATSN1-M6  | GAATATCTGGAAGTT | CAGGCCCAAAGG | TTTTACATTTT  | CAGAGGTGGGAT  | TTTATATTAG |          |            |          |            |           |
| ATSN1-Ref | GAATATCTGGAAGTT | CAGGCCCAAAGG | CCTTACATCTC  | CCAGAGGCGGGAC | CCATACCAG  |          |            |          |            |           |

|           |             |                 |                |                  |            |          |          |          |           |          |           |          |
|-----------|-------------|-----------------|----------------|------------------|------------|----------|----------|----------|-----------|----------|-----------|----------|
|           | <b>2</b>    | <b>2</b>        | <b>2</b>       | <b>22</b>        | <b>222</b> | <b>5</b> | <b>2</b> | <b>6</b> | <b>12</b> | <b>2</b> | <b>22</b> | <b>5</b> |
| ATSN1-M1  | AAATTCATCTT | CTTTGGAAAAGAGAT | CCTTCCCAACGTGT | CTCGAATCCAGCACCT | CTAT       |          |          |          |           |          |           |          |
| ATSN1-M2  | AAATTTATTTT | TTTTGGAAAAGAGAT | TTTTTTTAACGTGT | TCGAATTTAGCATTT  | TCTAT      |          |          |          |           |          |           |          |
| ATSN1-M3  | AAATTTATTTT | TTTTGGAAAAGAGAT | TTTTTTTAACGTGT | TCGAATTCAGTACC   | TCTAT      |          |          |          |           |          |           |          |
| ATSN1-M4  | AAATTTATTTT | TTTTGGAAAAGAGAT | TTTTTTTAATGTGT | TCGAATTTAGTATTT  | TCTAT      |          |          |          |           |          |           |          |
| ATSN1-M5  | AAATTTATTTT | TTTTGGAAAAGAGAT | TTTTTTTAACGTGT | TCGAATTTAGTATTT  | TCTAT      |          |          |          |           |          |           |          |
| ATSN1-M6  | AAATTCATCTT | CTTTGGAAAAGAGAT | CCTTCCCAACGTGT | CTCGAATTTAGTATTT | TTAT       |          |          |          |           |          |           |          |
| ATSN1-Ref | AAATTCATCTT | CTTTGGAAAAGAGAT | CCTTCCCAACGTGT | CTCGAATCCAGCACCT | TCTAT      |          |          |          |           |          |           |          |

|           |              |                |              |           |          |          |          |
|-----------|--------------|----------------|--------------|-----------|----------|----------|----------|
|           | <b>4</b>     | <b>22</b>      | <b>5</b>     | <b>22</b> | <b>2</b> | <b>2</b> | <b>3</b> |
| ATSN1-M1  | CTGAGAGATTTA | TCACTGGGCCAAC  | CAACATGTTGGT |           |          |          |          |
| ATSN1-M2  | CTGAGAGATTTA | CTACTGGGTTAATA | TAATATGTTGGT |           |          |          |          |
| ATSN1-M3  | TTGAGAGATTTA | TTATGGGTTAATA  | TAATATGTTGGT |           |          |          |          |
| ATSN1-M4  | TTGAGAGATTTA | TTACTGGGTTAATA | ACGTTGGT     |           |          |          |          |
| ATSN1-M5  | CTGAGAGATTTA | CCACTGGGCCAAC  | ACACGTTGGT   |           |          |          |          |
| ATSN1-M6  | CTGAGAGATTTA | TTACTGGGTTAATA | ACGTTGGT     |           |          |          |          |
| ATSN1-Ref | CTGAGAGATTTA | CCACTGGGCCAAC  | ACACGTTGGT   |           |          |          |          |

# B

|            | 4      | 2         | 112          | 32         | 2         | 2      | 123        | 5 | 010 | 01 |
|------------|--------|-----------|--------------|------------|-----------|--------|------------|---|-----|----|
| ATSN1AL2-1 | GAATAT | CTGGAAGTT | CAGGCCCAAAGG | CCTTACATCT | TCCAGAGGC | CGGGAT | TTTATATTAG |   |     |    |
| ATSN1AL2-2 | GAATAT | TGGAAGTT  | TAGGTTTAAAGG | CCTTACATCT | CCCAGAGGC | CGGGAT | TCTATATCAG |   |     |    |
| ATSN1AL2-3 | GAATAT | CTGGAAGTT | CAGGTTTAAAGG | TTTTATATTT | TTTAGAGGC | CGGGAT | TTTATATTAG |   |     |    |
| ATSN1AL2-4 | GAATAT | CTGGAAGTT | TAGGTTCAAAGG | TTTTATATTT | TTTAGAGGC | CGGGAT | TTTATATTAG |   |     |    |
| ATSN1AL2-5 | GAATAT | TGGAAGTT  | TAGGTTTAAAGG | TTTTATATTT | TTTAGAGGC | TGGGAT | TTTATATTAG |   |     |    |
| ATSN1AL2-6 | GAATAT | CTGGAAGTT | TAGGTTTAAAGG | TTTTATATTT | TTTAGAGGC | CGGGAT | TTTATATTAG |   |     |    |
| ATSN1-Ref  | GAATAT | CTGGAAGTT | CAGGCCCAAAGG | CCTTACATCT | CCCAGAGGC | CGGGAT | CCCATACCAG |   |     |    |

|            | 0     | 2      | 1               | 12   | 212        | 6       | 4     | 5     | 04    | 1    | 02   | 3 |
|------------|-------|--------|-----------------|------|------------|---------|-------|-------|-------|------|------|---|
| ATSN1AL2-1 | AAATT | TATCTT | TTTTGGAAAAGAGAT | TTTT | TTTAACGTGT | CTCGAAT | TCAGT | ATTT  | CTAT  |      |      |   |
| ATSN1AL2-2 | AAATT | TATTTT | TTTTGGAAAAGAGAT | TCTT | CTCAACGTGT | CTCGAAT | TTAGT | ATTT  | TTAT  |      |      |   |
| ATSN1AL2-3 | AAATT | TATCTT | TTTTGGAAAAGAGAT | CCTT | CCCAACGTGT | CTTGAAT | TCAGT | ATTT  | TTAT  |      |      |   |
| ATSN1AL2-4 | AAATT | TATTTT | TTTTGGAAAAGAGAT | TTTT | TTTAACGTGT | CTCGAAT | TCAGT | ATTT  | CTAT  |      |      |   |
| ATSN1AL2-5 | AAATT | TATTTT | TTTTGGAAAAGAGAT | TTTT | TTTAACGTGT | TTT     | TCAGT | ATTT  | CTAT  |      |      |   |
| ATSN1AL2-6 | AAATT | TATTTT | TTTTGGAAAAGGGAT | TTTT | TTTAACGTGT | TTT     | TCAGT | ATTT  | CTAT  |      |      |   |
| ATSN1-Ref  | AAATT | CATCTT | TTTTGGAAAAGAGAT | CCTT | CCCAAC     | CGTGT   | CTT   | CGAAT | CCAGC | ACCT | CTAT |   |

|            | 4            | 01               | 3         | 01      | 0 | 0 | 4 |
|------------|--------------|------------------|-----------|---------|---|---|---|
| ATSN1AL2-1 | TTGAGAGATTTA | TTACTGGGTTAATAA  | TACGTTGGT |         |   |   |   |
| ATSN1AL2-2 | CTGAGAGATTTA | TTACTGGGTTAATAA  | TACGTTGGT |         |   |   |   |
| ATSN1AL2-3 | CTGAGAGATTTA | TATTTGGGTTAATAA  | TACGTTGGT |         |   |   |   |
| ATSN1AL2-4 | CTGAGAGATTTA | TCATTTGGGTTAATAA | TGTTGGT   |         |   |   |   |
| ATSN1AL2-5 | CTGAGAGATTTA | TGTTGGGTTAATAA   | TACGTTGGT |         |   |   |   |
| ATSN1AL2-6 | TTGAGAGATTTA | TTACTGGGTTAATAA  | TGTTGGT   |         |   |   |   |
| ATSN1-Ref  | CTGAGAGATTTA | CCACTGGGCCCAACA  | CAAC      | CGTTGGT |   |   |   |
