# Supplementary material
Source: PubMed Central journal article supplement (PMC2682068)

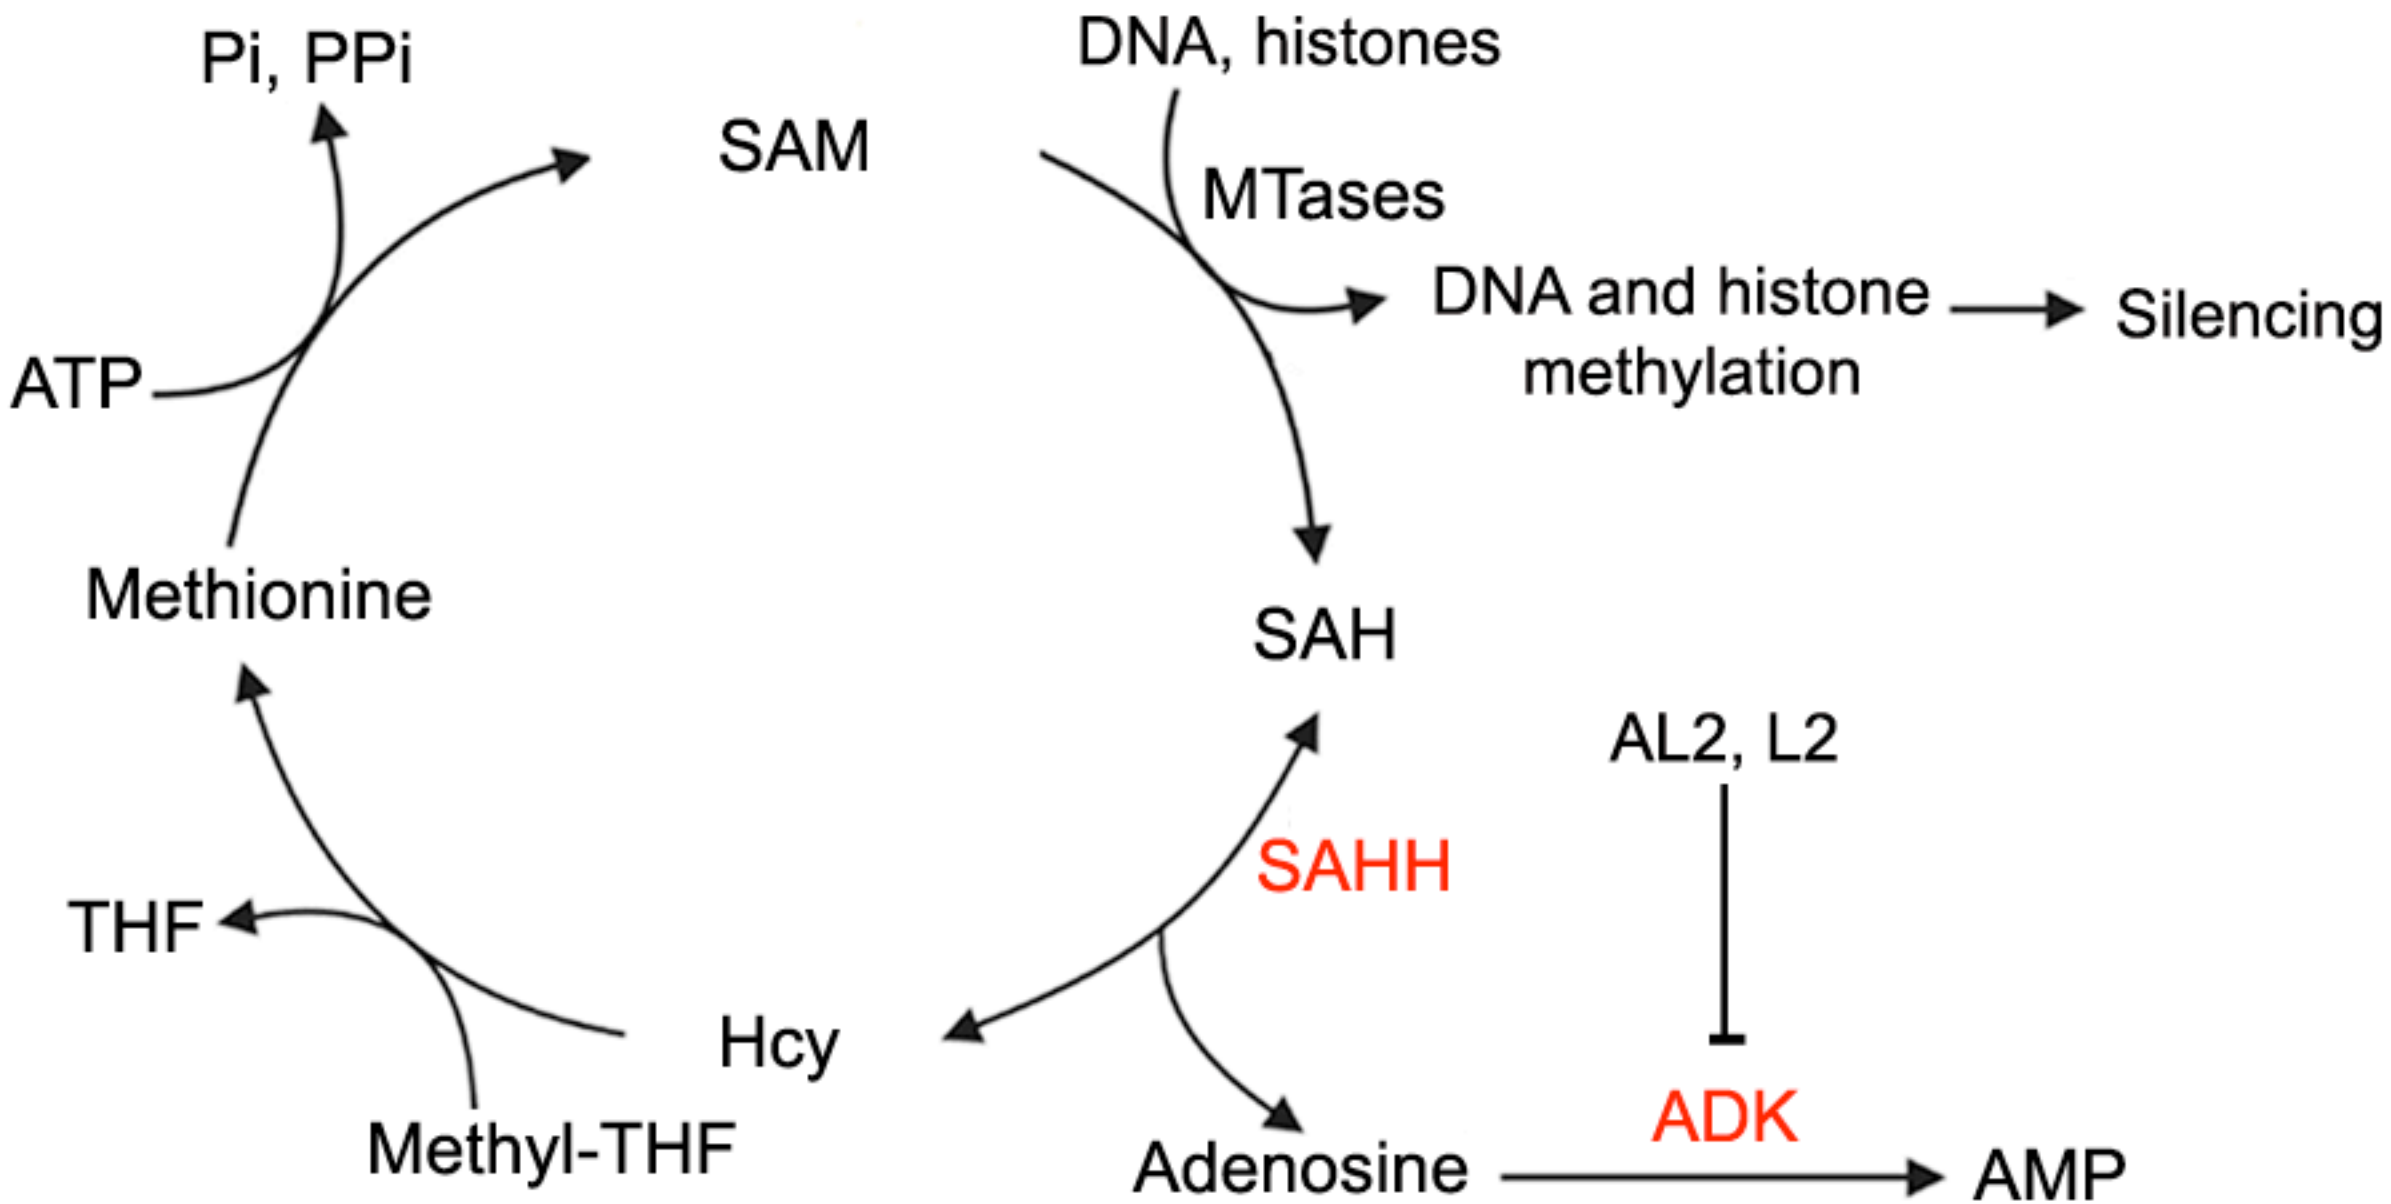

Supplement: supp_83_10_5005__1.pdf [file supp_83_10_5005__1.pdf]
